# Supplementary material for: THADA drives Golgi residency and upregulation of PD-L1 in cancer cells and provides promising target for immunotherapy
Source: PubMed Central journal article supplement — J Immunother Cancer. 2021 Aug 2;9(8):e002443. doi: 10.1136/jitc-2021-002443 (PMC8330570; doi:10.1136/jitc-2021-002443), 2021-08-02
Supplement: jitc-2021-002443supp001.pdf [file jitc-2021-002443supp001.pdf]

## Supplementary Information

## Supplementary Figures

Supplementary Fig.1

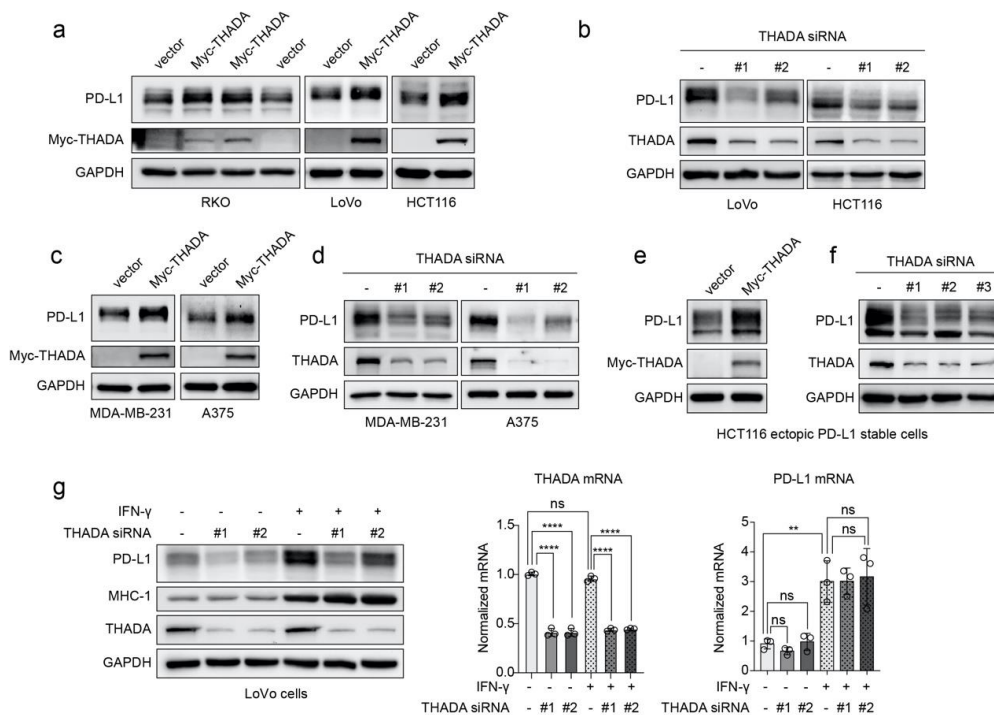

**Supplementary Fig.1 THADA positively regulated PD-L1.** **a-d**, Western blot showing the effect of THADA overexpression (**a,c**) and depletion (**b,d**), respectively, on PD-L1 expression in the indicated cells. The experiments were repeated three times independently with similar results. **e,f**, Western blot showing the effect of THADA overexpression (**e**) and depletion (**f**) on exogenous PD-L1 expression in HCT116 ectopic PD-L1 stable cells. The experiments were repeated three times independently with similar results. **g**, LoVo cells transfected with two distinct THADA siRNAs and co-incubated with IFN- $\gamma$  (100ng/mL, 24h), subjected to western blot (left) and RT-PCR (right). Values are means  $\pm$  s.d. from  $n = 3$  independent experiments. Statistical differences were evaluated by ANOVA post-hoc test (Tukey). \*\*,  $P < 0.002$ ; \*\*\*\*,  $P < 0.0001$ ; ns, no significance.

## Supplementary Fig. 2

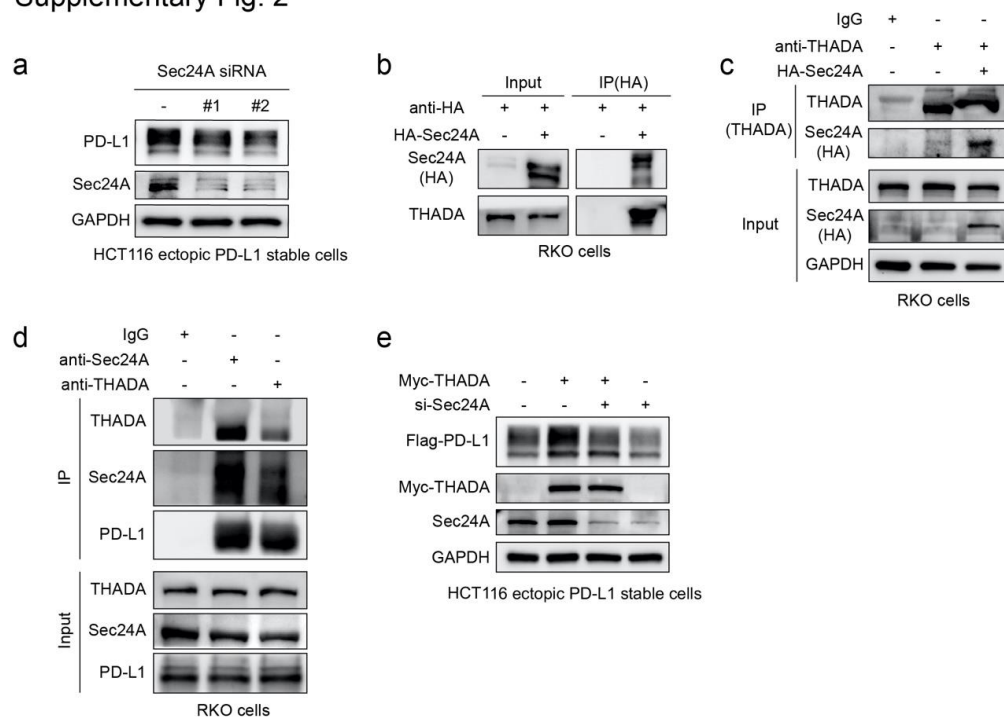

**Supplementary Fig. 2 THADA required for Sec24A-dependent vesicle trafficking of PD-L1.** **a**, Western blot showing the effect of Sec24A depletion on exogenous PD-L1 expression in HCT116 ectopic PD-L1 stable cells. **b,c**, Co-IP assays showing the interaction between THADA and Sec24A in RKO cells. **d**, Co-IP assay showing the interactions among THADA, Sec24A and PD-L1 in RKO cells. **e**, Overexpression of Myc-tagged THADA and depletion of Sec24A as indicated in denoted cells and subjected to western blot with indicated antibodies.

Supplementary Fig.3

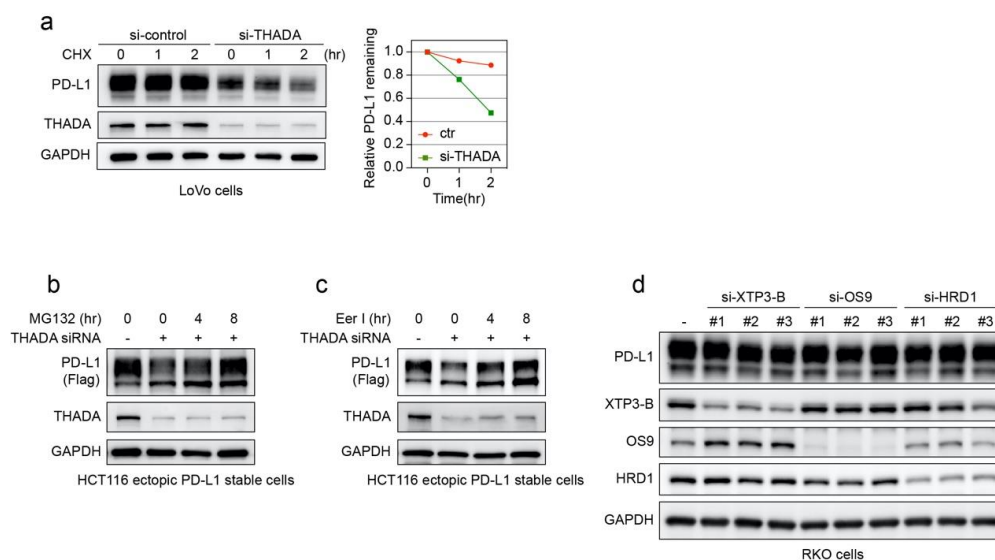

**Supplementary Fig.3 THADA depletion induced ER-associated degradation of PD-L1.** **a**, Left, LoVo cells transfected with THADA siRNAs and co-incubated with cycloheximide (CHX) (50 $\mu$ g/mL) for denoted time points, and subjected to western blot with indicated antibodies. Right, quantification of gray value of remained PD-L1. The experiment was repeated three times independently with similar results. **b,c**, Western blot showing the effect of THADA depletion on PD-L1 expression in the absence or presence of proteasomal inhibitor MG132 (10 $\mu$ M) and ERAD inhibitor Eer I (10 $\mu$ M). **d**, Western blot evaluating PD-L1 expression transfected with XTP3-B, HRD1 and OS9 siRNAs as denoted. The experiment was repeated three times independently with similar results.

Supplementary Fig.4

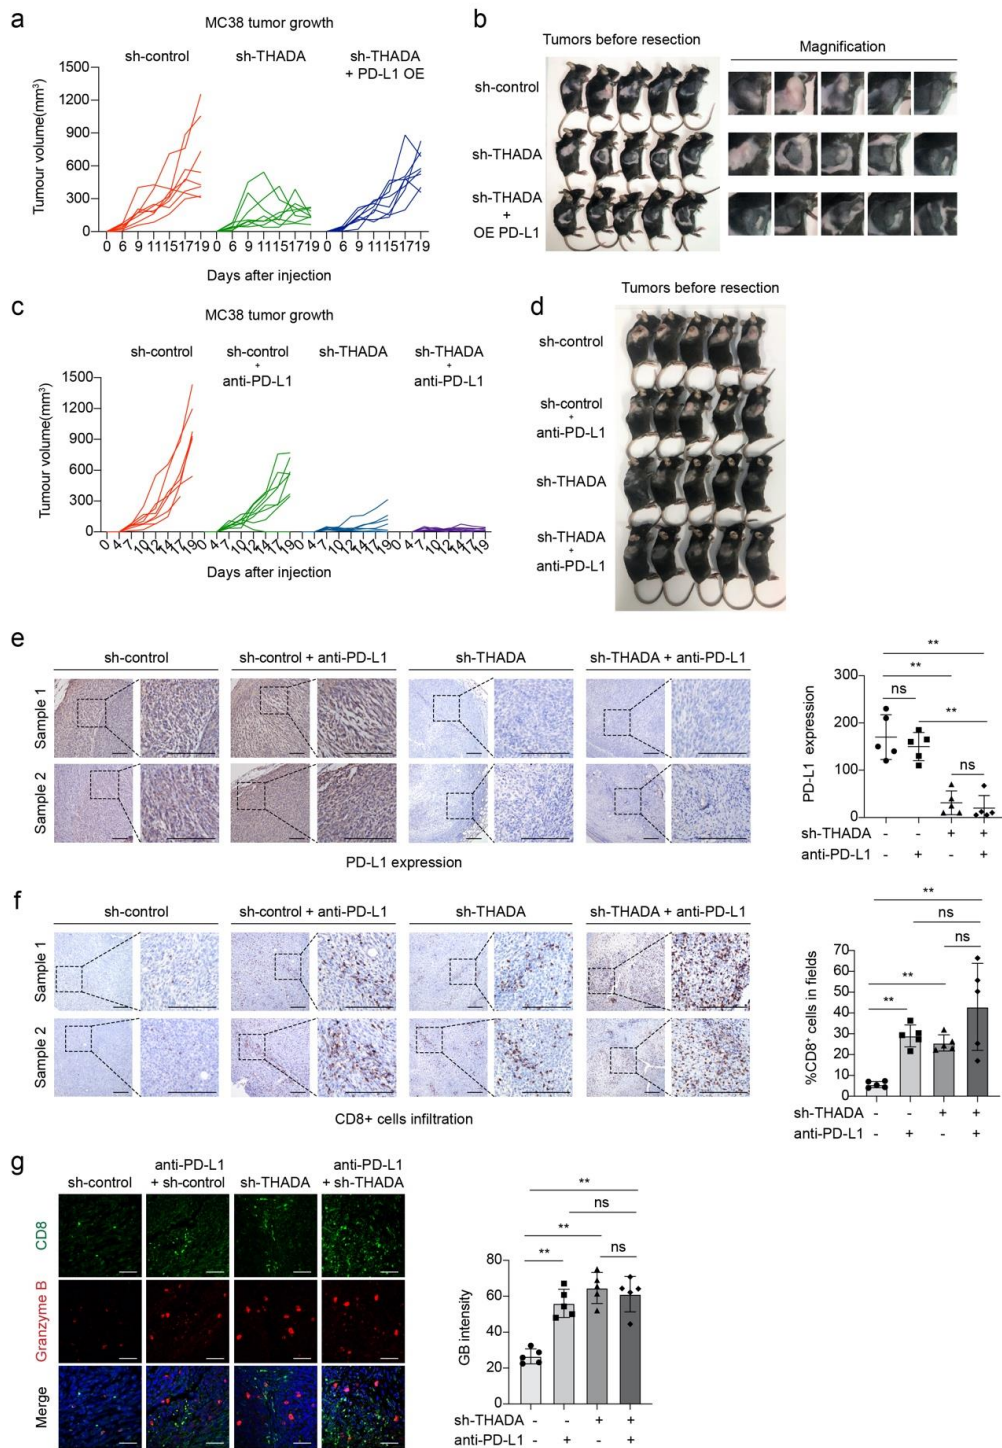

**Supplementary Fig.4 Targeting THADA improved PD-L1-dependent tumor immune response in vivo. a**, Tumor growth rate of each individual inoculated with indicated MC38 stable clones (n=8 per group). **b**, Representative individuals bearing

tumors before resection and the magnified images of tumors on mice. **c**, Tumor growth rate of each individual that received indicated treatment after inoculation of indicated MC38 stable clones (n=8 per group). **d**, Representative individuals bearing tumors before resection. **e**, Left, immunohistochemistry assay showing mouse PD-L1 expression in indicated tumor tissues. Dashed boxes denote the representative fields to be magnified. Scale bars, 200 $\mu$ m. Right, statistical result for PD-L1 expression assessed using H score. Values are means  $\pm$  s.d. from five independent samples from each group. Statistical differences were evaluated by ANOVA post-hoc test. \*\*, P < 0.05. ns, no significance. **f**, Left, immunohistochemistry assay showing CD8+ cell infiltration in indicated tumor tissues. Dashed boxes denote the representative fields to be magnified. Scale bars, 200 $\mu$ m. Right, quantification of CD8+ cell infiltration in indicated tumor tissues. Values are means  $\pm$  s.d. from five independent samples from each group. The P value was determined by ANOVA post-hoc test. \*\*, P < 0.05. ns, no significance. **g**, Immunofluorescence assays showing CD8+ T cell infiltration and granzyme B release in indicated tumor tissues. Scale bars, 50 $\mu$ m. Values are means  $\pm$  s.d. from five independent samples of each group. Statistical differences were evaluated by ANOVA post-hoc test. \*\*, P < 0.05. ns, no significance.

### Supplementary Table

**Supplementary Table 1. Sequences of siRNAs used in this paper.**

| Name        | Sense                 | Antisense             |
|-------------|-----------------------|-----------------------|
| si-THADA#1  | GCGAAUAGCUAGAGCUCAUTT | AUGAGCUCUAGCUAUUCGCTT |
| si-THADA#2  | GCAGUGAUCCUUCAUCUAATT | UUAGAUGAAGGAUCACUGCTT |
| si-THADA#3  | GCACAGAAAUUGUUUCCAUTT | AUGGAAACAAUUUCUGUGCTT |
| si-Sec24A#1 | GCCAGAGUUUGUUAGACAATT | UUGUCUAACAAACUCUGGCTT |
| si-Sec24A#2 | GCUGAUGUUCAAGCAAUUUTT | AAAUUGCUUGAACAUCAGCTT |
| si-OS9#1    | GCGGAUUUGAUUCGAUUCATT | UGAAUCGAAUCAAAUCCGCTT |

|                  |                       |                       |
|------------------|-----------------------|-----------------------|
| si-OS9#2         | CGACCAAGGAUGACAGUAATT | UUACUGUCAUCCUUGGUCGTT |
| si-OS9#3         | GGUCCAAGUGCGACCUUAATT | UUAAGGUCGCACUUGGACCTT |
| si-XTP3-B#1      | GCAGUUGUUCUACAGAAUTT  | AUUCUGUAGGAACAACUGCTT |
| si-XTP3-B#2      | GGAUAUGUUGGCCAAGAATT  | UUCUUGGCCAACAUUUCCTT  |
| si-XTP3-B#3      | GGACAACCCACAUAUCCAATT | UUGGAUAUGUGGGUUGUCCTT |
| si-HRD1#1        | GCUCUUUCACUGCCGCAUUTT | AAUGCGGCAGUGAAAGAGCTT |
| si-HRD1#2        | GCAUGGCAGUCCUGUACAUTT | AUGUACAGGACUGCCAUGCTT |
| si-HRD1#3        | UCAUCUGCCGAGAAGAGAUTT | AUCUCUUCUCGGCAGAUGATT |
| Negative control | UUCUCCGAACGUGUCACGUTT | ACGUGACACGUUCGGAGAATT |

**Supplementary Table 2. Sequences of lentiviral shRNA used in this paper.**

| Name      | Sequence              |
|-----------|-----------------------|
| shTHADA#1 | GCAGCCTTCTGTCACTTTACA |
| shTHADA#2 | GCTGGAAAGGAACACATTAGT |

**Supplementary Table 3. DNA primer sequences for quantitative real-time PCR.**

| Name          | Coding                | Anticoding              |
|---------------|-----------------------|-------------------------|
| PD-L1 (human) | TGGCATTGCTGAACGCATTT  | TGCAGCCAGGTCTAATTGTTTT  |
| PD-L1 (mouse) | GACGCAGGCGTTTACTGCT   | GCGGTATGGGGCATTGACTTT   |
| GAPDH         | GGAGCGAGATCCCTCCAAAAT | GGCTGTTGTCATACTTCTCATGG |

|                   |                      |                        |
|-------------------|----------------------|------------------------|
| ACTB<br>(mouse)   | GGCTGTATTCCCCTCCATCG | CCAGTTGGTAACAATGCCATGT |
| THADA<br>(human)  | TCACGGATGGAGTGTCAAAA | TGAATAGTGGGATCACACATGC |
| THADA<br>(mouse)  | CCCTGGCATGTTCTCTTACT | GCGACCACACCTGATAATGAA  |
| Sec24A<br>(human) | CTACACCAATGCCTTCTA   | GCTGTGGATGGATAGTTA     |

---
